# Supplementary material for: Evolution of Extra Virgin Olive Oil Quality under Different Storage Conditions
Source: MDPI journal article supplement (doi:10.3390/foods10081945), 2021-08-21
Supplement: s1 [file s1]

## Supplementary Material

# Evolution of extra virgin olive oil quality under different storage conditions

Soraya Mousavi<sup>1</sup>, Roberto Mariotti<sup>1\*</sup>, Vitale Stanzione<sup>2</sup>, Saverio Pandolfi<sup>1</sup>, Valerio Mastio<sup>3</sup>, Luciana Baldoni<sup>1</sup>, Nicolò G. M. Cultrera<sup>1</sup>

<sup>1</sup> Institute of Biosciences and Bioresources, National Research Council, 06128 Perugia, Italy; [soraya.mousavi@ibbr.cnr.it](mailto:soraya.mousavi@ibbr.cnr.it) (S.M.); [roberto.mariotti@ibbr.cnr.it](mailto:roberto.mariotti@ibbr.cnr.it) (R.M.); [saverio.pandolfi@ibbr.cnr.it](mailto:saverio.pandolfi@ibbr.cnr.it) (S.P.); [luciana.baldoni@ibbr.cnr.it](mailto:luciana.baldoni@ibbr.cnr.it) (L.B.); [niccolo.cultrera@ibbr.cnr.it](mailto:niccolo.cultrera@ibbr.cnr.it) (N.C.)

<sup>2</sup> Institute for Agricultural and Forest Systems of the Mediterranean, National Research Council, 06128 Perugia, Italy; [vitale.stanzione@cnr.it](mailto:vitale.stanzione@cnr.it) (V.S.)

<sup>3</sup> Estación Experimental Agropecuaria San Juan, Instituto Nacional de Tecnología Agropecuaria (INTA), Consejo Nacional de Investigaciones Científicas y Técnicas (CONICET), San Juan, Argentina; [mastio.valerio@inta.gob.ar](mailto:mastio.valerio@inta.gob.ar) (V.M.)

\* Correspondence: [roberto.mariotti@ibbr.cnr.it](mailto:roberto.mariotti@ibbr.cnr.it); Tel.: +39 075 5014809

**Table S1.** Free acidity (% of oleic acid), peroxide value (meq O<sub>2</sub> kg<sup>-1</sup>) and total phenols (mg kg<sup>-1</sup> of oil) of three kinds of oil in different storage conditions in each time point. Different letters (P < 0.01 and P < 0.05) show significant differences in each single column.

| LP             | T0      | T18*    | T18-72h  | T18-1m  | T18-8m  | T36*    |
|----------------|---------|---------|----------|---------|---------|---------|
| Free acidity   |         |         |          |         |         |         |
| AT             | 0.17    | 0.21    | 0.26a    | 0.29a   | 0.35    | 0.42a   |
| AT+Ar          | 0.15    | 0.19    | 0.22ab   | 0.25ab  | 0.33    | 0.41a   |
| 4°C            | 0.16    | 0.18    | 0.24a    | 0.26ab  | 0.35    | 0.19b   |
| -18°C          | 0.16    | 0.18    | 0.20b    | 0.23b   | 0.31    | 0.18b   |
| Peroxide value |         |         |          |         |         |         |
| AT             | 5.43    | 14.49a  | 16.37a   | 16.63a  | 31.55a  | 32.85a  |
| AT+Ar          | 5.20    | 6.37c   | 6.97c    | 8.54b   | 24.60b  | 28.35b  |
| 4°C            | 5.54    | 8.68b   | 12.64b   | 17.15a  | 35.19a  | 17.60c  |
| -18°C          | 5.86    | 7.22bc  | 11.28b   | 15.76a  | 33.50a  | 12.24d  |
| Total phenols  |         |         |          |         |         |         |
| AT             | 104.887 | 143ab   | 125.97b  | 105.07  | 102.19  | 54.62c  |
| AT+Ar          | 108.60  | 154.48a | 125.00b  | 115.90  | 115.17  | 64.24c  |
| 4°C            | 109.50  | 162.16a | 148.59a  | 122.87  | 117.74  | 103.95a |
| -18°C          | 107.67  | 124.46b | 129.04ab | 120.74  | 115.97  | 85.03b  |
| MP             | T0      | T18*    | T18-72h  | T18-1m  | T18-8m  | T36*    |
| Free acidity   |         |         |          |         |         |         |
| AT             | 0.21    | 0.26a   | 0.27     | 0.29a   | 0.35    | 0.45a   |
| AT+Ar          | 0.21    | 0.23b   | 0.26     | 0.27ab  | 0.36    | 0.40a   |
| 4°C            | 0.20    | 0.22b   | 0.23     | 0.24b   | 0.33    | 0.18b   |
| -18°C          | 0.19    | 0.23b   | 0.25     | 0.24b   | 0.34    | 0.19b   |
| Peroxide value |         |         |          |         |         |         |
| AT             | 4.40    | 10.74ab | 11.17b   | 12.29bc | 31.86   | 38.62a  |
| AT+Ar          | 4.44    | 13.16a  | 14.01a   | 15.02ab | 29.97   | 35.25b  |
| 4°C            | 4.77    | 9.58b   | 11.59ab  | 15.50a  | 31.14   | 15.60c  |
| -18°C          | 4.52    | 8.19b   | 8.92b    | 11.47c  | 26.38   | 9.60d   |
| Total phenols  |         |         |          |         |         |         |
| AT             | 206.17  | 235.86  | 249.61   | 194.32  | 153.10b | 100.26b |
| AT+Ar          | 206.37  | 270.05  | 235.39   | 193.15  | 163.69b | 112.21b |
| 4°C            | 206.17  | 233.97  | 237.31   | 203.62  | 154.94b | 178.30a |
| -18°C          | 206.17  | 252.87  | 263.14   | 209.62  | 195.41a | 133.8ab |
| HP             | T0      | T18*    | T18-72h  | T18-1m  | T18-8m  | T36*    |
| Free acidity   |         |         |          |         |         |         |
| AT             | 0.25a   | 0.26a   | 0.27     | 0.27    | 0.35    | 0.39a   |
| 4°C            | 0.25a   | 0.26a   | 0.25     | 0.26    | 0.34    | 0.25b   |
| -18°C          | 0.18b   | 0.20b   | 0.22     | 0.26    | 0.34    | 0.23b   |
| Peroxide value |         |         |          |         |         |         |
| AT             | 2.62    | 11.16a  | 14.11a   | 18.16a  | 29.22a  | 35.22a  |
| 4°C            | 2.78    | 4.97b   | 6.21b    | 9.22b   | 24.54b  | 11.60b  |
| -18°C          | 2.62    | 3.88b   | 5.73b    | 9.07b   | 21.88b  | 4.72c   |
| Total phenols  |         |         |          |         |         |         |
| AT             | 469.77  | 441.51  | 439.21b  | 413.79  | 269.16b | 140.55b |
| 4°C            | 477.22  | 496.84  | 507.26ab | 452.93  | 359.68a | 421.39a |
| -18°C          | 504.56  | 544.07  | 568.98a  | 506.44  | 339.31a | 382.17a |

\*Closed bottles.

Maximum values of EVOO quality parameters (EU Reg. 2015/1830):

Free acidity, 0.30%; Peroxide value, 20 meq O<sub>2</sub> kg<sup>-1</sup>.

**Table S2.** K<sub>232</sub> and K<sub>270</sub> extinction coefficients of three kinds of oils in different storage conditions in each time point. Different letters (P < 0.01 and P < 0.05) show significant differences in each single column.

| <b>LP</b>              | <b>T0</b> | <b>T18*</b> | <b>T18-72h</b> | <b>T18-1m</b> | <b>T18-8m</b> | <b>T36*</b> |
|------------------------|-----------|-------------|----------------|---------------|---------------|-------------|
| <b>K<sub>232</sub></b> |           |             |                |               |               |             |
| <b>AT</b>              | 0.071     | 0.09        | 0.08a          | 0.08a         | 9.71          | 11.4b       |
| <b>AT+Ar</b>           | 0.071     | 0.10        | 0.04c          | 0.05c         | 10.32         | 12.25a      |
| <b>4°C</b>             | 0.071     | 0.11        | 0.06b          | 0.06b         | 10.73         | 0.11c       |
| <b>-18°C</b>           | 0.071     | 0.10        | 0.04c          | 0.04c         | 9.76          | 0.01c       |
| <b>K<sub>270</sub></b> |           |             |                |               |               |             |
| <b>AT</b>              | 0.06      | 0.08a       | 0.09bc         | 0.08          | 2.67a         | 2.9a        |
| <b>AT+Ar</b>           | 0.06      | 0.07ab      | 0.14a          | 0.08          | 1.98b         | 2.69a       |
| <b>4°C</b>             | 0.06      | 0.06c       | 0.07c          | 0.09          | 2.95a         | 0.07b       |
| <b>-18°C</b>           | 0.06      | 0.06bc      | 0.12ab         | 0.10          | 2.59a         | 0.02b       |
| <b>MP</b>              | <b>T0</b> | <b>T18*</b> | <b>T18-72h</b> | <b>T18-1m</b> | <b>T18-8m</b> | <b>T36*</b> |
| <b>K<sub>232</sub></b> |           |             |                |               |               |             |
| <b>AT</b>              | 0.05      | 0.1         | 0.05           | 0.03a         | 9.95          | 11.21b      |
| <b>AT+Ar</b>           | 0.05      | 0.11        | 0.05           | 0.02b         | 9.55          | 11.39a      |
| <b>4°C</b>             | 0.05      | 0.11        | 0.05           | 0.03a         | 9.89          | 0.12c       |
| <b>-18°C</b>           | 0.05      | 0.10        | 0.05           | 0.03ab        | 9.88          | 0.05d       |
| <b>K<sub>270</sub></b> |           |             |                |               |               |             |
| <b>AT</b>              | 0.05      | 0.08        | 0.09           | 0.17a         | 2.00b         | 2.92b       |
| <b>AT+Ar</b>           | 0.05      | 0.08        | 0.09           | 0.16a         | 2.56a         | 3.12a       |
| <b>4°C</b>             | 0.05      | 0.08        | 0.09           | 0.13b         | 2.54a         | 0.08c       |
| <b>-18°C</b>           | 0.05      | 0.07        | 0.08           | 0.13b         | 2.35ab        | 0.08c       |
| <b>HP</b>              | <b>T0</b> | <b>T18*</b> | <b>T18-72h</b> | <b>T18-1m</b> | <b>T18-8m</b> | <b>T36*</b> |
| <b>K<sub>232</sub></b> |           |             |                |               |               |             |
| <b>AT</b>              | 0.04      | 0.10        | 0.05           | 0.04          | 9.52          | 11.48a      |
| <b>4°C</b>             | 0.04      | 0.08        | 0.04           | 0.03          | 10.64         | 0.08b       |
| <b>-18°C</b>           | 0.04      | 0.08        | 0.04           | 0.03          | 9.34          | 0.01b       |
| <b>K<sub>270</sub></b> |           |             |                |               |               |             |
| <b>AT</b>              | 0.04      | 0.11a       | 0.21a          | 0.08          | 2.46a         | 2.88a       |
| <b>4°C</b>             | 0.04      | 0.08b       | 0.16b          | 0.08          | 2.26a         | 0.08b       |
| <b>-18°C</b>           | 0.04      | 0.08b       | 0.15b          | 0.08          | 1.82b         | 0.01c       |

\*Closed bottles.

Maximum values of EVOO quality parameters (EU Reg. 2015/1830): K<sub>270</sub>, 0.22; K<sub>232</sub>, 2.50.

**Table S3.** The p-value of ANOVA analyses among different time points for three kinds of oil. The non-significant and  $p < 0.05$  were showed by bold superscript ns and \*, respectively, all other values were significant at  $p < 0.01$ .

| Compound              | AT                     | AT + Ar   | 4°C                    | -18°C                  |
|-----------------------|------------------------|-----------|------------------------|------------------------|
| Tyrosol-LP            | 7.12E-07               | 3.54E-06  | 7.82E-06               | 7.61E-07               |
| Tyrosol-MP            | 3.31E-05               | 2.45E-06  | 7.97E-06               | 2.32E-06               |
| Tyrosol-HP            | 3.98E-06               |           | 3.36E-06               | 2.51E-06               |
| Hydroxytyrosol-LP     | 5.07E-05               | 1.84E-05  | 1.38E-05               | 1.39E-05               |
| Hydroxytyrosol-MP     | 0.000228               | 0.000107  | 2.57E-06               | 1.1E-05                |
| Hydroxytyrosol-HP     | 1.33E-05               |           | 9.57E-06               | 2.04E-05               |
| Oleuropein-LP         | 4.98E-05               | 1.24E-06  | 4.27E-05               | 8.79E-07               |
| Oleuropein-MP         | 2.84E-05               | 9.5E-06   | 1.04E-05               | 1.15E-05               |
| Oleuropein-HP         | 3.08E-06               |           | 4.72E-06               | 9.36E-07               |
| Oleacein-LP           | 0.001473               | 0.000193  | 1.25E-05               | 0.000112               |
| Oleacein-MP           | 1.37E-05               | 8.74E-06  | 0.000389               | 0.142425 <sup>ns</sup> |
| Oleacein-HP           | 7.99E-06               |           | 0.003418               | 0.000408               |
| Oleocanthal-LP        | 0.085834 <sup>ns</sup> | 0.044468* | 0.000645               | 0.002858               |
| Oleocanthal-MP        | 0.091088 <sup>ns</sup> | 0.012771* | 0.01089*               | 0.000585               |
| Oleocanthal-HP        | 8.81E-06               |           | 0.004224               | 0.00018                |
| 3,4-DHPEA-EA-LP       | 8.61E-05               | 2.98E-05  | 1.03E-05               | 9.8E-06                |
| 3,4-DHPEA-EA-MP       | 0.000153               | 5.36E-06  | 1.84E-05               | 7.44E-06               |
| 3,4-DHPEA-EA-HP       | 7.11E-06               |           | 1.59E-05               | 1.97E-05               |
| p-HPEA-EA-LP          | 0.000103               | 0.00015   | 6.63E-06               | 0.000453               |
| p-HPEA-EA-MP          | 4.04E-05               | 6.35E-05  | 9.31E-06               | 1.96E-05               |
| p-HPEA-EA-HP          | 0.000172               |           | 6.08E-06               | 4.47E-05               |
| Pinoresinol-LP        | 3.25E-05               | 6.34E-05  | 6.51E-05               | 1.88E-05               |
| Pinoresinol-MP        | 7.28E-05               | 4.73E-05  | 1.8E-05                | 0.000379               |
| Pinoresinol-HP        | 0.000326               |           | 1.9E-05                | 7.4E-06                |
| Acetoxypinoresinol-LP | 0.027117*              | 6.02E-05  | 0.000583               | 0.007268               |
| Acetoxypinoresinol-MP | 1.46E-05               | 1.37E-05  | 5.23E-06               | 1.26E-05               |
| Acetoxypinoresinol-HP | 6.54E-06               |           | 9.63E-05               | 2.65E-05               |
| Luteolin-LP           | 0.001544               | 0.001613  | 0.009755               | 0.01175*               |
| Luteolin-MP           | 0.102757 <sup>ns</sup> | 0.024285* | 0.039881*              | 0.003388               |
| Luteolin-HP           | 0.000667               |           | 0.000226               | 0.004262               |
| Apigenin-LP           | 0.002763               | 0.001265  | 0.001563               | 0.001679               |
| Apigenin-MP           | 0.00523                | 0.00843   | 0.019822*              | 0.00036                |
| Apigenin-HP           | 3.68E-05               |           | 0.061126 <sup>ns</sup> | 0.002052               |
| α-Tocopherol-LP       | 0.000101               | 2.7E-05   | 1.2E-05                | 2.79E-05               |
| α-Tocopherol-MP       | 0.000232               | 9.95E-05  | 1.72E-05               | 1.81E-05               |
| α-Tocopherol-HP       | 5.9E-06                |           | 0.00016                | 7.68E-06               |
| β-Tocopherol-LP       | 1.46E-05               | 1.36E-05  | 1.34E-05               | 1.17E-05               |
| β-Tocopherol-MP       | 4.51E-06               | 6.51E-06  | 8.75E-06               | 6.23E-05               |
| β-Tocopherol-HP       | 0.000152               |           | 7.43E-05               | 8.11E-05               |
| γ-Tocopherol-LP       | 0.001166               | 0.000242  | 0.000403               | 0.000496               |
| γ-Tocopherol-MP       | 0.001374               | 0.001025  | 0.0014                 | 0.00328                |
| γ-Tocopherol-HP       | 0.000476               |           | 0.000399               | 0.000351               |

**Table S4.** The p-value of ANOVA analyses among different time points for three kinds of oil. The non-significant and  $p < 0.05$  were showed by bold superscript ns and \*, respectively, all other values were significant at  $p < 0.01$ .

| Compound               | AT        | AT + Ar  | 4°C                    | -18°C                  |
|------------------------|-----------|----------|------------------------|------------------------|
| Squalene-LP            | 2.2E-05   | 2.45E-06 | 2.11E-05               | 1.98E-05               |
| Squalene-MP            | 1.36E-05  | 1.25E-06 | 7.55E-05               | 4.6E-05                |
| Squalene-HP            | 1.24E-05  |          | 3.38E-05               | 9.19E-06               |
| $\beta$ -Sitosterol-LP | 1.12E-05  | 0.000209 | 2.95E-05               | 2.64E-05               |
| $\beta$ -Sitosterol-MP | 3.67E-05  | 2.96E-05 | 2.98E-05               | 1.96E-05               |
| $\beta$ -Sitosterol-HP | 3.51E-06  |          | 9.4E-06                | 2.25E-05               |
| $\beta$ -Sitostanol-LP | 2.21E-05  | 5.47E-05 | 0.003314               | 0.002316               |
| $\beta$ -Sitostanol-MP | 0.001808  | 0.000503 | 0.000629               | 0.000213               |
| $\beta$ -Sitostanol-HP | 0.000298  |          | 0.001492               | 2.51E-05               |
| Campesterol-LP         | 0.009968  | 0.000792 | 0.003523               | 0.001925               |
| Campesterol-MP         | 0.014246* | 0.000857 | 0.073725 <sup>ns</sup> | 0.00594                |
| Campesterol-HP         | 0.000534  |          | 0.008855               | 0.00044                |
| Stigmasterol-LP        | 0.030178* | 0.02969* | 0.023058*              | 0.071656 <sup>ns</sup> |
| Stigmasterol-MP        | 0.000879  | 0.000724 | 0.039262*              | 0.024456*              |
| Stigmasterol-HP        | 0.000679  |          | 0.000975               | 0.052048 <sup>ns</sup> |
| Total Chlorophyll-LP   | 1E-06     | 5.93E-06 | 5.12E-06               | 1.24E-05               |
| Total Chlorophyll-MP   | 9.56E-06  | 2.29E-05 | 2.41E-06               | 1.73E-06               |
| Total Chlorophyll-HP   | 6.39E-05  |          | 3.56E-06               | 1.36E-05               |
| $\beta$ -Carotene-LP   | 2.97E-05  | 8.31E-05 | 2.57E-05               | 0.000418               |
| $\beta$ -Carotene-MP   | 4.9E-05   | 5.63E-05 | 5.99E-05               | 2.48E-05               |
| $\beta$ -Carotene-HP   | 0.00049   |          | 4.91E-05               | 0.000137               |

**Table S5:** Mean value of the main fatty acids in three different oil samples, under four storage conditions and in six time points.

| <b>LP-Storage condition</b> | <b>Time point</b> | <b>C16:0</b> | <b>C18:1</b> | <b>C18:2</b> | <b>C18:3</b> |
|-----------------------------|-------------------|--------------|--------------|--------------|--------------|
| AT                          | T0                | 13.48        | 78.37        | 7.78         | 1.03         |
| AT                          | T18               | 13.34        | 78.00        | 7.83         | 0.76         |
| AT                          | T18-72h           | 12.93        | 76.39        | 7.63         | 0.73         |
| AT                          | T18-1m            | 13.76        | 77.88        | 7.73         | 0.69         |
| AT                          | T18-8m            | 14.00        | 76.90        | 7.53         | 0.70         |
| AT + Ar                     | T0                | 13.22        | 79.87        | 7.51         | 0.72         |
| AT + Ar                     | T18               | 13.29        | 77.11        | 7.83         | 0.79         |
| AT + Ar                     | T18-72h           | 13.65        | 77.72        | 7.81         | 0.69         |
| AT + Ar                     | T18-1m            | 13.99        | 77.83        | 7.87         | 0.71         |
| AT + Ar                     | T18-8m            | 13.10        | 78.27        | 7.60         | 0.69         |
| 4°C                         | T0                | 13.76        | 78.21        | 7.59         | 0.96         |
| 4°C                         | T18               | 13.79        | 77.62        | 7.63         | 0.72         |
| 4°C                         | T18-72h           | 13.54        | 77.65        | 7.68         | 0.69         |
| 4°C                         | T18-1m            | 14.98        | 76.70        | 7.29         | 0.72         |
| 4°C                         | T18-8m            | 15.08        | 76.26        | 7.20         | 0.70         |
| 4°C                         | T36               | 15.99        | 76.49        | 7.22         | 0.75         |
| -18°C                       | T0                | 13.76        | 78.21        | 7.59         | 1.01         |
| -18°C                       | T18               | 13.74        | 77.72        | 7.67         | 0.77         |
| -18°C                       | T18-72h           | 13.02        | 77.30        | 7.53         | 0.71         |
| -18°C                       | T18-1m            | 13.64        | 77.83        | 7.84         | 0.75         |
| -18°C                       | T18-8m            | 15.15        | 76.19        | 7.75         | 0.72         |
| -18°C                       | T36               | 15.11        | 76.62        | 7.40         | 0.73         |
| <b>MP-Storage condition</b> | <b>Time point</b> | <b>C16:0</b> | <b>C18:1</b> | <b>C18:2</b> | <b>C18:3</b> |
| AT                          | T0                | 15.01        | 76.00        | 7.92         | 0.85         |
| AT                          | T18               | 15.05        | 76.80        | 7.17         | 0.70         |
| AT                          | T18-72h           | 15.63        | 76.14        | 7.61         | 0.69         |
| AT                          | T18-1m            | 16.01        | 76.17        | 7.13         | 0.65         |
| AT                          | T18-8m            | 15.17        | 76.17        | 7.96         | 0.66         |
| AT + Ar                     | T0                | 15.21        | 76.13        | 7.54         | 0.98         |
| AT + Ar                     | T18               | 15.68        | 76.30        | 7.14         | 0.72         |
| AT + Ar                     | T18-72h           | 15.80        | 76.54        | 6.99         | 0.64         |
| AT + Ar                     | T18-1m            | 15.11        | 76.80        | 7.20         | 0.66         |
| AT + Ar                     | T18-8m            | 15.80        | 76.21        | 7.24         | 0.68         |
| 4°C                         | T0                | 15.01        | 76.42        | 7.23         | 0.85         |
| 4°C                         | T18               | 15.36        | 76.61        | 7.37         | 0.69         |
| 4°C                         | T18-72h           | 15.88        | 76.22        | 7.22         | 0.64         |
| 4°C                         | T18-1m            | 15.86        | 76.29        | 7.26         | 0.66         |
| 4°C                         | T18-8m            | 15.83        | 76.35        | 7.14         | 0.63         |
| 4°C                         | T36               | 15.85        | 76.27        | 7.16         | 0.68         |
| -18°C                       | T0                | 16.01        | 76.21        | 7.03         | 0.85         |
| -18°C                       | T18               | 15.77        | 76.01        | 7.35         | 0.68         |
| -18°C                       | T18-72h           | 15.94        | 76.04        | 7.33         | 0.70         |
| -18°C                       | T18-1m            | 15.13        | 77.01        | 7.26         | 0.67         |
| -18°C                       | T18-8m            | 15.60        | 76.42        | 7.15         | 0.69         |

|                      |            |              |              |              |              |
|----------------------|------------|--------------|--------------|--------------|--------------|
| -18°C                | T36        | 15.76        | 76.42        | 7.19         | 0.74         |
| HP-Storage condition | Time point | <b>C16:0</b> | <b>C18:1</b> | <b>C18:2</b> | <b>C18:3</b> |
| AT                   | T0         | 13.85        | 78.97        | 6.35         | 0.84         |
| AT                   | T18        | 12.65        | 79.88        | 6.49         | 0.66         |
| AT                   | T18-72h    | 13.08        | 78.84        | 6.87         | 0.65         |
| AT                   | T18-1m     | 13.46        | 78.94        | 6.43         | 0.61         |
| AT                   | T18-8m     | 13.51        | 78.73        | 6.25         | 0.59         |
| 4°C                  | T0         | 13.55        | 78.39        | 6.74         | 0.89         |
| 4°C                  | T18        | 13.88        | 78.95        | 6.49         | 0.65         |
| 4°C                  | T18-72h    | 13.81        | 79.30        | 6.31         | 0.63         |
| 4°C                  | T18-1m     | 14.25        | 78.20        | 6.55         | 0.65         |
| 4°C                  | T18-8m     | 13.70        | 78.02        | 7.21         | 0.64         |
| 4°C                  | T36        | 13.96        | 78.24        | 6.70         | 0.70         |
| -18°C                | T0         | 13.85        | 78.25        | 6.55         | 0.89         |
| -18°C                | T18        | 13.91        | 78.41        | 6.69         | 0.69         |
| -18°C                | T18-72h    | 13.84        | 78.42        | 6.63         | 0.69         |
| -18°C                | T18-1m     | 14.48        | 78.23        | 6.58         | 0.69         |
| -18°C                | T18-8m     | 13.71        | 79.10        | 6.45         | 0.66         |
| -18°C                | T36        | 14.15        | 78.33        | 6.48         | 0.70         |

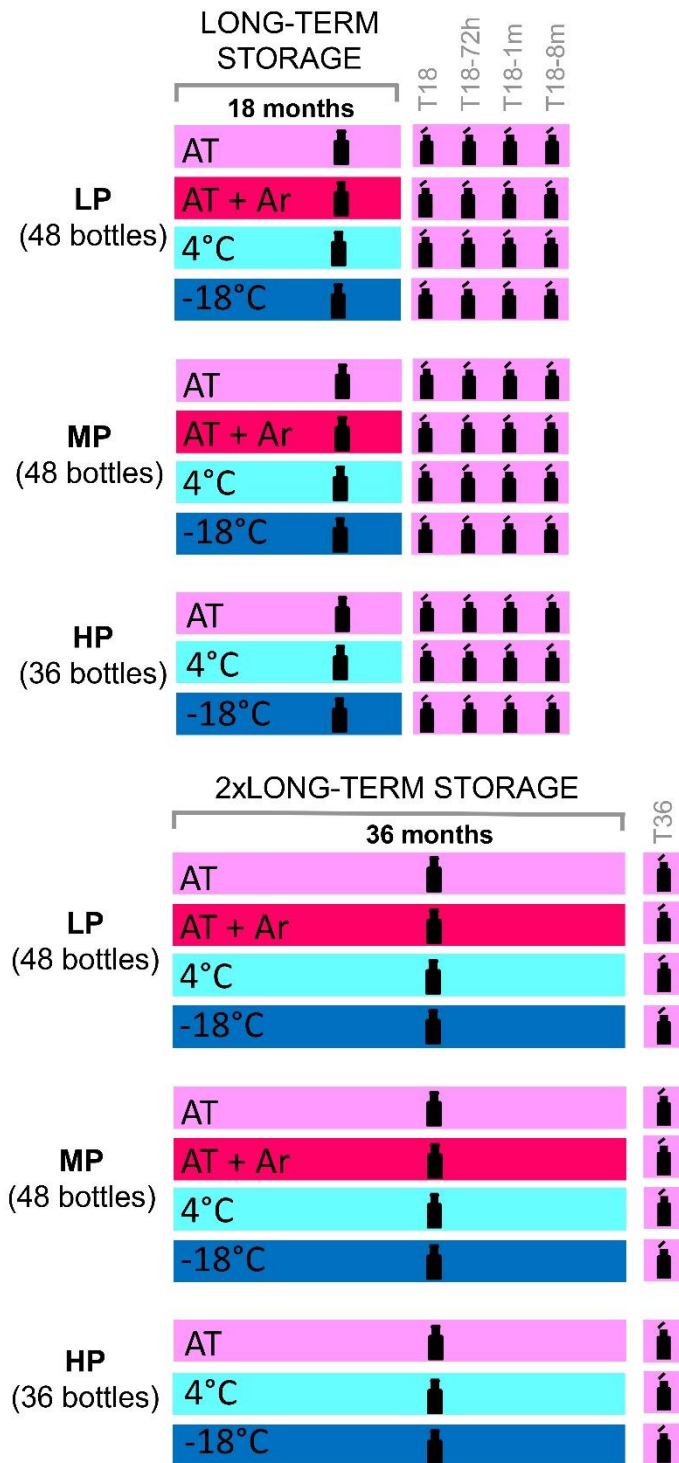

**Figure S1:** Schematic view of the experimental design. At each time point, three bottles were used for the analyses.



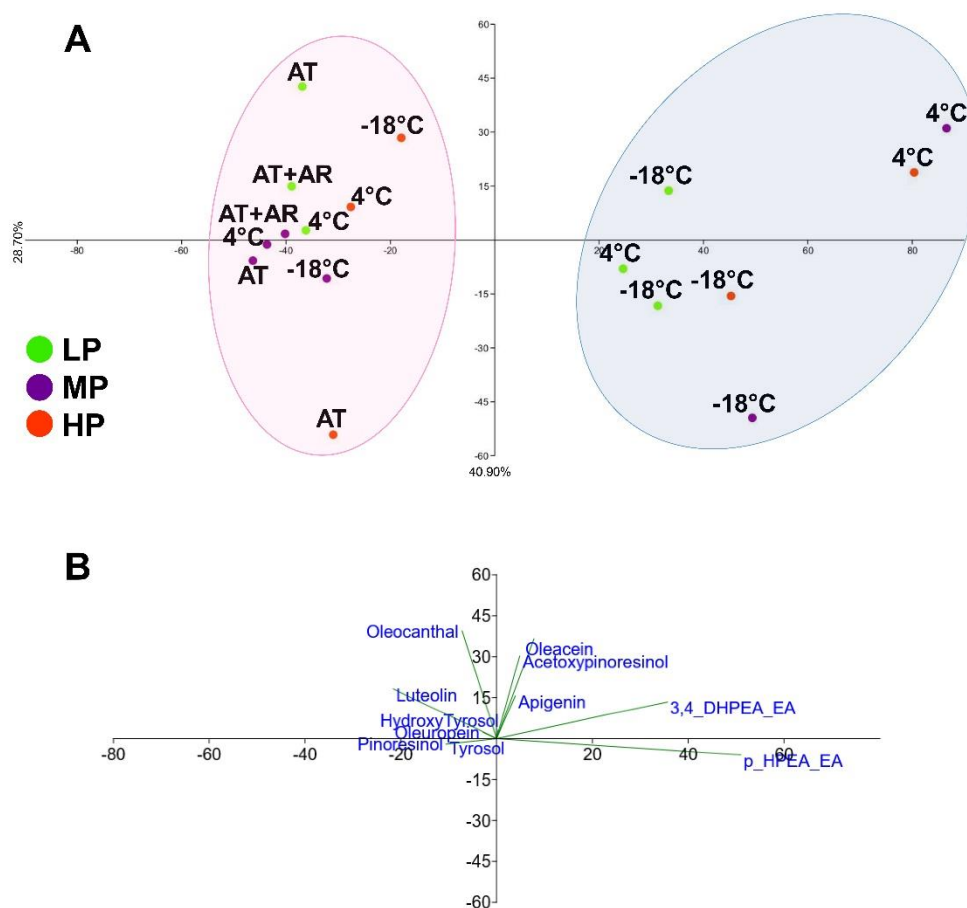

**Figure S2:** The scatter plot (A) and biplot (B) of the principal component analysis (PCA), by using the percentage of reduction in content of 11 phenolic compounds in EVOOs from T18 to T18-8m (pink area) and among T18 and T36 (blue area) conditions. Colored circles indicate the type of oil, green: LP oil; purple: MP oil; orange: HP oil.
